# Supplementary material for: The Impact of Childhood Acute Otitis Media on Parental Quality of Life in a Prospective Observational Cohort Study
Source: PubMed Central journal article supplement — Clin Drug Investig. 2015 Sep 8;35(10):613–24. doi: 10.1007/s40261-015-0319-1 (PMC4579255; doi:10.1007/s40261-015-0319-1), 2015-09-08
Supplement: 40261_2015_319_MOESM1_ESM.pdf [file 40261_2015_319_MOESM1_ESM.pdf]

**The Impact of Childhood Acute Otitis Media on Parental Quality of Life in a  
Prospective Observational Cohort Study**

*Clinical Drug Investigation*

Katsiaryna Holl\* • Mats Rosenlund\* • Carlo Giaquinto • Sven-Arne Silfverdal • Alfonso Carmona • James  
Larcombe • José Garcia-Sicilia • Ahmet Fuat • Maria Eulalia Muñoz • María Luisa Arroba • Brigitte Sloesen •  
Jens Vollmar • Jean-Yves Pirçon • Johannes G. Liese

\*GlaxoSmithKline Vaccines, Avenue Fleming, 20, 1300 Wavre, Belgium

e-mail: [katsiaryna.x.holl@gsk.com](mailto:katsiaryna.x.holl@gsk.com)

**Online Resource 1** The procedure used to adapt the ENT questionnaire to AOM.

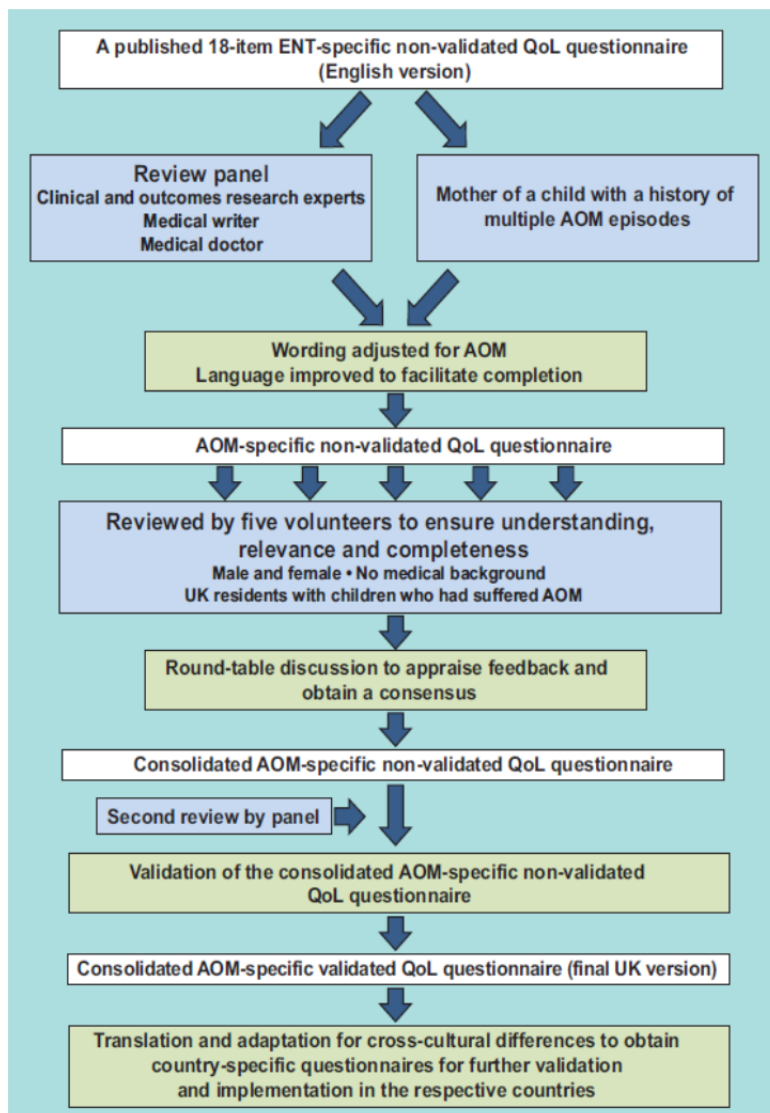

*AOM* acute otitis media, *ENT* ear, nose and throat, *QoL* quality of life

## Reference

1. Berdeaux G, Hervie C, Smajda C, Marquis P, Rhinitis Survey Group. Parental quality of life and recurrent ENT infections in their children: development of a questionnaire. *Qual Life Res.* 1998;7:501-12.
